# Supplementary material for: Prevention of excitotoxicity‐induced processing of BDNF receptor TrkB‐FL leads to stroke neuroprotection
Source: PubMed Central journal article supplement (PMC6609917; doi:10.15252/emmm.201809950), 2019-06-03
Supplement: EMMM-11-e9950-s001.pdf [file EMMM-11-e9950-s001.pdf]

## **APPENDIX**

### **“Prevention of excitotoxicity-induced processing of BDNF receptor TrkB-FL leads to stroke neuroprotection”**

#### Table of contents

|                           |   |
|---------------------------|---|
| ▪ Appendix Figure S1..... | 2 |
| ▪ Appendix Figure S2..... | 3 |
| ▪ Appendix Figure S3..... | 4 |
| ▪ Appendix Figure S4..... | 5 |
| ▪ Appendix Table S1.....  | 6 |

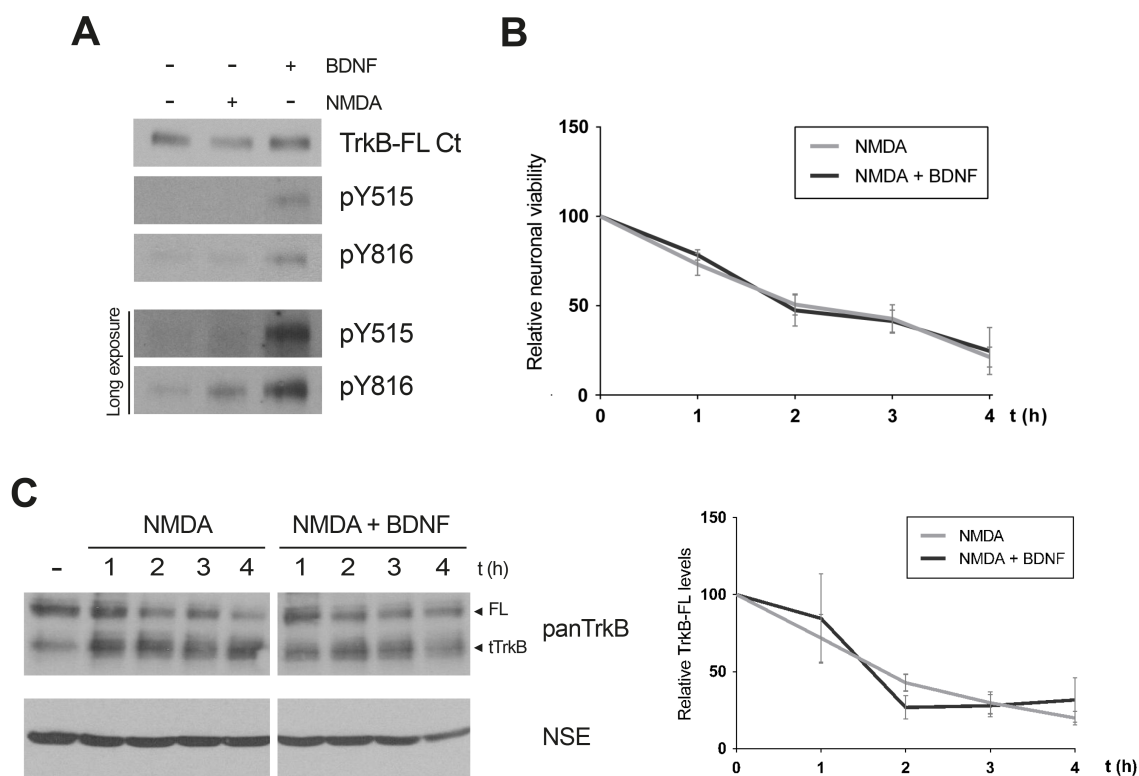

### Appendix Figure S1. Analysis of primary neuronal cultures treated with NMDA and BDNF.

(A) Analysis of TrkB-FL phosphorylation. Cultures were treated with NMDA (100  $\mu$ M) or BDNF (100 ng/ml) for 1 h. Total lysates were analyzed by WB with TrkB-FL Ct or phospho-specific TrkB antibodies for residues Y515 and Y816. Two different exposures are presented to highlight inducibility by BDNF (upper panels) or basal levels of TrkB-FL phosphorylation (lower panels).

(B) Effect of BDNF pretreatment on neuronal death induced by excitotoxicity. Cultures were preincubated 1 h with BDNF or vehicle and treated with NMDA for 1-4 h as before. Values for each time point were represented relative to those of the untreated cultures. Mean  $\pm$  SEM of three independent experiments is given. Data were analyzed by a two-way ANOVA test followed by *post-hoc* Bonferroni test comparing values for each time point corresponding to NMDA or NMDA + BDNF. No significant differences were found.

(C) Effect of BDNF pretreatment on TrkB levels. Immunoblot analysis of cultures treated as above with NMDA for 1-4 h using panTrkB and NSE antibodies. Normalized TrkB-FL levels are presented relative to values obtained in untreated cells. Means  $\pm$  SEM are given (n = 5). Results were analyzed as above.

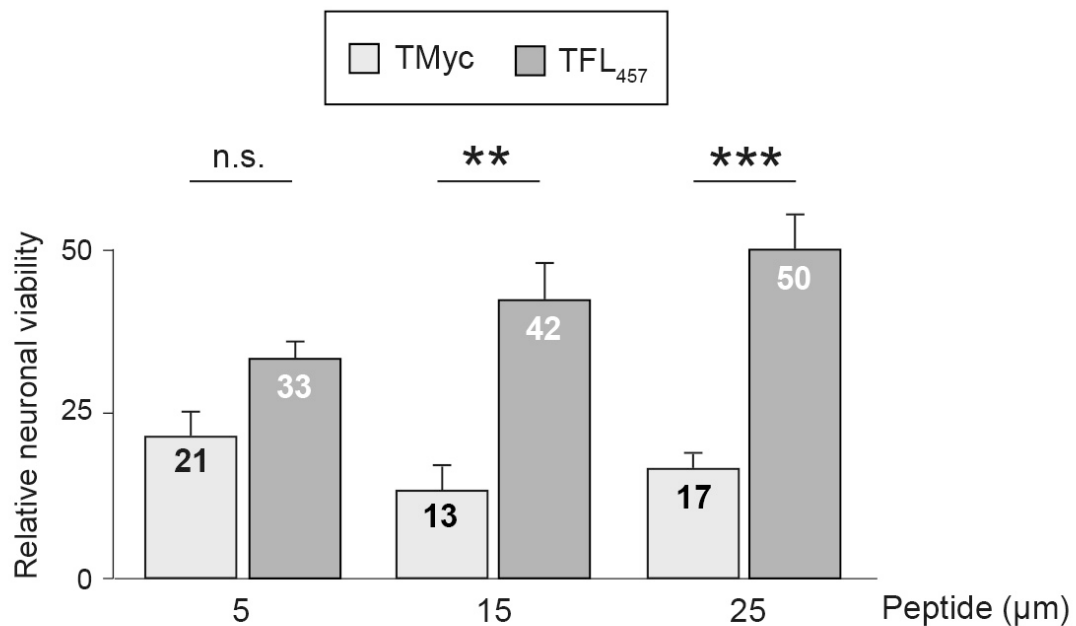

**Appendix Figure S2. Dose-dependent effect of TFL<sub>457</sub> on neuronal viability after induction of excitotoxicity.**

Neuronal viability was established in cultures preincubated with TMyc or TFL<sub>457</sub> (5, 15 or 25 μM) for 30 min and treated with NMDA for 4 h. Average values are represented relative to those obtained in neurons incubated with the same concentration of peptide but no NMDA, arbitrarily given a 100% value (n = 6). Statistical significance was determined by one-way ANOVA followed by Tukey's HSD *post-hoc* test, comparing for each peptide concentration the neuronal viability of cultures preincubated with TMyc or TFL<sub>457</sub> (n.s. = non-significant,  $p = 0.38$ ; \*\* $p = 0.003$ ; \*\*\* $p = 0.000002$ ).

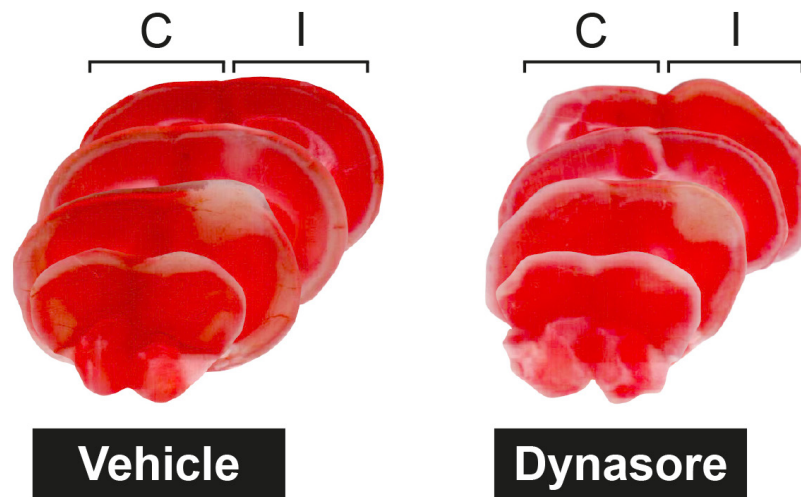

**Appendix Figure S3. Assessment of brain ischemic damage at early times after inhibition of dynamin-dependent endocytosis.**

Mice were injected with dynasore (30 mg/Kg) or vehicle before damage induction and sacrificed 3 h after brain insult. We present representative 2 mm brain coronal slices, briefly stained with TTC to facilitate dissection of the infarcted area of the ipsilateral hemisphere (I) and the corresponding region of the contralateral area (C). At this early time, emergent cortical infarcts that evolve with time can be observed.

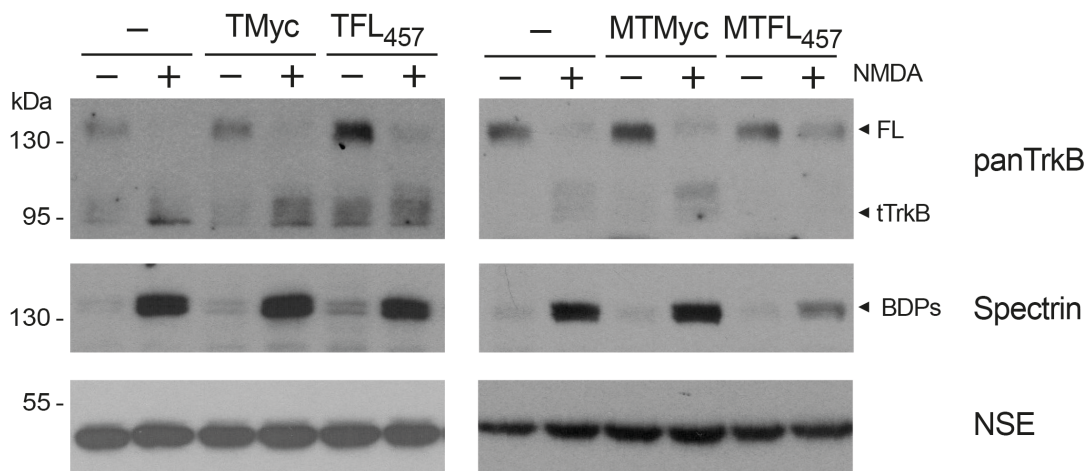

**Appendix Figure S4. MTFL<sub>457</sub> interferes TrkB-FL downregulation induced by *in vitro* excitotoxicity.**

Primary cultures were preincubated for 30 min with with 25  $\mu$ M of MTMyc, MTFL<sub>457</sub>, or no peptide before induction of excitotoxicity by NMDA treatment (2 h). Results were compared to those obtained with the non-modified peptides, TMyc and TFL<sub>457</sub>, having free  $\alpha$ -amino and carboxyl groups in their N-ter and C-ter.

**Appendix Table S1. Description of reagents or resources used in the study**

| REAGENT or RESOURCE                                                                              | SOURCE            | IDENTIFIER                           |
|--------------------------------------------------------------------------------------------------|-------------------|--------------------------------------|
| <b>Antibodies</b>                                                                                |                   |                                      |
| Rabbit polyclonal anti- <b>CREB</b> (1:1000)                                                     | Cell Signaling    | Cat#9197;<br>RRID:AB_331277          |
| Rabbit polyclonal anti- <b>pS133-CREB</b> (1:1000)                                               | Millipore         | Cat#06-519;<br>RRID:AB_310153        |
| Mouse monoclonal anti- <b>GluN1</b> (1:1000)                                                     | BD Biosciences    | Cat#556308;<br>RRID:AB_396353        |
| Goat polyclonal anti- <b>GluN2A</b> (1:250)                                                      | Santa Cruz        | Cat#sc-1468;<br>RRID:AB_670223       |
| Mouse monoclonal anti- <b>MEF2D</b> (1:1000)                                                     | BD Biosciences    | Cat# 610774,<br>RRID:AB_398095       |
| Mouse monoclonal anti-RBFOX3/ <b>NeuN</b> (1:100)                                                | Novus             | Cat#NBP1-92693SS;<br>RRID:AB_1103747 |
| Rabbit polyclonal anti-neuronal-specific enolase ( <b>NSE</b> ) (1:50000)                        | Millipore         | Cat#AB951;<br>RRID:AB_92390          |
| Mouse monoclonal anti- <b>phosphotyrosine</b> (4 µg/mg of protein)                               | Millipore         | Cat#05-321;<br>RRID:AB_309678        |
| Mouse monoclonal anti- <b>spectrin</b> alpha chain (1:50000)                                     | Millipore         | Cat#MAB1622;<br>RRID:AB_94295        |
| Rabbit polyclonal anti- <b>TrkB-FL (C-ter region)</b> (1:500)                                    | Santa Cruz        | Cat#sc-11;<br>RRID:AB_632554         |
| Rabbit polyclonal anti- <b>TrkB-T1</b> (isoform-specific C-ter) (1:500)                          | Santa Cruz        | Cat#sc-119;<br>RRID:AB_632559        |
| Mouse monoclonal anti-TrkB (extracel. seq. common to all TrkB isoforms; <b>panTrkB</b> ) (1:500) | Santa Cruz        | Cat#sc-136990;<br>RRID:AB_2155262    |
| Rabbit polyclonal anti-pY490-TrkA (anti- <b>pY515-TrkB</b> ) (1:500)                             | Cell Signaling    | Cat#9141;<br>RRID:AB_2298805         |
| Rabbit monoclonal anti- <b>pY816-TrkB</b> (1:500)                                                | Boster            | Cat#P01388                           |
| Goat anti-mouse IgG Alexa Fluor 546 (1:500)                                                      | Molecular Probes  | Cat#A-11030;<br>RRID:AB_144695       |
| Donkey anti-goat IgG-HRP (1:5000)                                                                | Santa Cruz        | Cat#sc-2056;<br>RRID:AB_631730       |
| Goat anti-mouse-HRP (1:5000)                                                                     | Santa Cruz        | Cat#sc-2005;<br>RRID:AB_631736       |
| Goat anti-rabbit-HRP (1:5000)                                                                    | Santa Cruz        | Cat#sc-2004;<br>RRID:AB_631746       |
| Donkey anti-rabbit IgG-heavy and light chain-HRP (1:50000)                                       | Bethyl            | Cat#A120-108P;<br>RRID:AB_10892625   |
| Donkey anti-mouse IgG-heavy and light chain-HRP (1:50000)                                        | Bethyl            | Cat#A90-137P;<br>RRID:AB_1211460     |
| <b>Chemicals, Peptides, and Recombinant Proteins</b>                                             |                   |                                      |
| <b>Ara C</b> (used at 10 µM)                                                                     | Sigma-Aldrich     | Cat#C1768;<br>CAS: 147-94-4          |
| Recombinant Human/Murine/Rat <b>BDNF</b> (used at 100 ng/ml)                                     | PeproTech         | Cat#450-02                           |
| EZ-Link Sulfo-NHS-SS- <b>Biotin</b> (used at 0.5 mg/ml)                                          | Thermo Fisher     | Cat#21331                            |
| Calpain inhibitor III ( <b>CalIII</b> ) (used at 10 µM)                                          | Calbiochem        | Cat#208722;<br>CAS: 88191-84-8       |
| <b>Calpeptin</b> (used at 10 µM)                                                                 | Calbiochem        | Cat#03-34-0051;<br>CAS: 117591-20-5  |
| <b>DAPI</b> (used at 0.5 or 5 µg/ml)                                                             | Molecular Probes  | Cat#D1306                            |
| <b>DL-AP5</b> (used at 200 µM)                                                                   | Tocris Bioscience | Cat#0101;<br>CAS: 76326-31-3         |
| <b>Dynasore</b> hydrate (used at 30 mg/kg)                                                       | Sigma-Aldrich     | Cat#D7693;<br>CAS: 1202867-00-2      |

|                                                                                      |                     |                                 |
|--------------------------------------------------------------------------------------|---------------------|---------------------------------|
| <b>Fluorescein Avidin D</b>                                                          | Vector Laboratories | Cat#A 2001                      |
| <b>Fluoro-Jade C</b> (used at 1 µg/ml)                                               | Millipore           | Cat#AG325                       |
| <b>Glycine</b> (used at 10 µM)                                                       | Bio-Rad             | Cat#161-0718                    |
| <b>GM6001</b> (used at 10 µM)                                                        | Tocris              | Cat#2983;<br>CAS: 142880-36-2   |
| <b>KG-501</b> (used at 10 µM)                                                        | Sigma-Aldrich       | Cat#70485;<br>CAS: 18228-17-6   |
| <b>Laminin</b> (used at 4 µg/ml)                                                     | Sigma-Aldrich       | Cat#L2020;<br>CAS: 114956-81-9  |
| <b>MTT</b> (used at 0.5 mg/ml)                                                       | Sigma-Aldrich       | Cat#M5655;<br>CAS: 298-93-1     |
| <b>NMDA</b> (used at 20 or 100 µM as indicated)                                      | Tocris              | Cat#0114;<br>CAS: 6384-92-5     |
| <b>PhosSTOP</b> phosphatases inhibitor cocktail tablets                              | Roche               | Cat#04 906 837 001              |
| <b>Poly-L-Lysine</b> (used at 100 µg/ml)                                             | Sigma-Aldrich       | Cat#P1524;<br>CAS: 25988-63-0   |
| <b>Prolong</b> Diamond antifade reagent                                              | Molecular Probes    | Cat#P36970                      |
| Complete <b>protease inhibitor</b> cocktail tablets                                  | Roche               | Cat#11 697 498 001              |
| Recombinant <b>Protein G Agarose</b>                                                 | Thermo Fisher       | Cat#15920010                    |
| <b>Rose Bengal</b> (used at 20 mg/kg)                                                | Sigma-Aldrich       | Cat#R3877;<br>CAS: 632-69-9     |
| <b>Streptavidin</b> resin                                                            | GenScript           | Cat#L00353                      |
| <b>TTC</b> (used at 2%)                                                              | Sigma-Aldrich       | Cat#T8877;<br>CAS: 298-96-4     |
| <b>U0126</b> (used at 300 nM)                                                        | Cell Signaling      | Cat#9903;<br>CAS: 109511-58-2   |
| <b>U-73122</b> (used at 5 µM)                                                        | Sigma-Aldrich       | Cat#U6756;<br>CAS: 112648-68-7  |
| <b>Wortmannin</b> (used at 100 nM)                                                   | Ascent Scientific   | Cat#Asc-148;<br>CAS: 19545-26-7 |
| <b>Cell-penetrating peptides</b>                                                     |                     |                                 |
| <b>TMyC</b> (YGRKKRRQRRRAEEQKLISEEDLLR)                                              | GenScript           | N/A                             |
| <b>MTMyC</b> (Ac-YGRKKRRQRRRAEEQKLISEEDLLR-NH <sub>2</sub> )                         | GenScript           | N/A                             |
| <b>Bio-TMyC</b> (Biotin-Ahx-YGRKKRRQRRRAEEQKLISEEDLLR-NH <sub>2</sub> )              | GenScript           | N/A                             |
| <b>TFL<sub>457</sub></b> (YGRKKRRQRRRHSKFGMKGPASVIS)                                 | GenScript           | N/A                             |
| <b>MTFL<sub>457</sub></b> (Ac-YGRKKRRQRRRHSKFGMKGPASVIS-NH <sub>2</sub> )            | GenScript           | N/A                             |
| <b>Bio-TFL<sub>457</sub></b> (Biotin-Ahx-YGRKKRRQRRRHSKFGMKGPASVIS-NH <sub>2</sub> ) | GenScript           | N/A                             |
| <b>TFL<sub>482</sub></b> (YGRKKRRQRRRHISNGSNTPPSSSEG)                                | GenScript           | N/A                             |
| <b>TFL<sub>518</sub></b> (YGRKKRRQRRRITNSQLKPDTFVQH)                                 | GenScript           | N/A                             |
| <b>TFL<sub>541</sub></b> (YGRKKRRQRRRELGEAFGKVF LAE)                                 | GenScript           | N/A                             |
| <b>Bio-NA-1</b> (Biotin-Ahx-YGRKKRRQRRRLSSIESDV-NH <sub>2</sub> )                    | GenScript           | N/A                             |
| <b>Primer sequences for real-time PCR</b>                                            |                     |                                 |
| GluN1-F (all isoforms): TCCACCAAGAGCCCTTCGTG                                         | Sigma-Aldrich       | N/A                             |
| GluN1-R (all isoforms): GCCCCGTACAGATCACCTTC                                         | Sigma-Aldrich       | N/A                             |
| GluN2A-F: ACGACTGGGACTACAGCCTG                                                       | Sigma-Aldrich       | N/A                             |
| GluN2A-R: CTTCTCTGCCTGCCCATAGC                                                       | Sigma-Aldrich       | N/A                             |
| TrkB-FL-F (isoform specific): TATCTTCACCCACCTCAAAC                                   | Sigma-Aldrich       | N/A                             |
| TrkB-FL-R (isoform specific): GAGAGACTTGACCTGAGCAC                                   | Sigma-Aldrich       | N/A                             |
| TrkB-T1-F (isoform specific): GGGGCTGTGCTGCTTGGT                                     | Sigma-Aldrich       | N/A                             |

|                                                                                                                                         |                                                                                                                                                                   |                                   |
|-----------------------------------------------------------------------------------------------------------------------------------------|-------------------------------------------------------------------------------------------------------------------------------------------------------------------|-----------------------------------|
| TrkB-T1-R (isoform specific):<br>GCTGCGGACATCTTTGGAGA                                                                                   | Sigma-Aldrich                                                                                                                                                     | N/A                               |
| BDNF-F (all isoforms): TGGCTGACACTTTTGAGCAC                                                                                             | Sigma-Aldrich                                                                                                                                                     | N/A                               |
| BDNF-R (all isoforms): GTTTGCGGCATCCAGGTAAT                                                                                             | Sigma-Aldrich                                                                                                                                                     | N/A                               |
| GAPDH-F: TTGCCATCAACGACCCCTTC                                                                                                           | Sigma-Aldrich                                                                                                                                                     | N/A                               |
| GAPDH-R: GCCTTGACTGTGCCGTTGAA                                                                                                           | Sigma-Aldrich                                                                                                                                                     | N/A                               |
| NSE-F: ACAGAATGGGGCTGTGTACC                                                                                                             | Sigma-Aldrich                                                                                                                                                     | N/A                               |
| NSE-R: TGGCAACTGTGGGACATGGC                                                                                                             | Sigma-Aldrich                                                                                                                                                     | N/A                               |
| Critical Commercial Assays                                                                                                              |                                                                                                                                                                   |                                   |
| BCA Protein Assay Kit                                                                                                                   | Thermo Fisher                                                                                                                                                     | Cat# 23225                        |
| Clarity Western ECL Blotting Substrate                                                                                                  | BioRad                                                                                                                                                            | Cat# 1705060                      |
| Lipofectamine 2000                                                                                                                      | Life Technologies                                                                                                                                                 | Cat#11668019                      |
| Experimental Models: Organisms/Strains                                                                                                  |                                                                                                                                                                   |                                   |
| Balb/c inbred mice (Balb/cOlaHsd)                                                                                                       | Harlan Laboratories                                                                                                                                               | N/A                               |
| Wistar Rat embryos (E18)                                                                                                                | In site facility                                                                                                                                                  | N/A                               |
| Recombinant DNA                                                                                                                         |                                                                                                                                                                   |                                   |
| <b>pIIIBDNF</b> (170 bp of rat <i>Bdnf</i> promoter III, containing a CRE-like element subcloned into pGL3-basic)                       | (Tao et al., 1998)                                                                                                                                                | N/A                               |
| <b>pCRE</b> (25-mer oligonucleotide with the sequence of two TrkB CREs subcloned into pTK-Luc)                                          | (Deogracias et al.,2004)                                                                                                                                          | N/A                               |
| <b>pGluN1</b> (pNRL 5.4 kb; 5.4 kb of rat <i>Grin1</i> containing three CREs and one MEF2 subcloned into pGL3-basic)                    | (Bai et al., 2003)                                                                                                                                                | N/A                               |
| <b>pGluN2A</b> (-1253 to -210 of mice <i>Grin2a</i> promoter with a CRE-like element subcloned into pGL3-basic)                         | (Desai et al., 2002)                                                                                                                                              | N/A                               |
| <b>pMEF2</b> (pRSRF; -307 to -242 of <i>Nur77</i> promoter with two MEF2 sites subcloned into pGL2-basic)                               | (Woronicz et al., 1995)                                                                                                                                           | N/A                               |
| <b>pMEF2mut</b> (two inactivating point mutations in each MEF2 site of pMEF2)                                                           | (Woronicz et al., 1995)                                                                                                                                           | N/A                               |
| <b>pTrkB</b> (-1600trkB-P2-Luc; -1606 to -325 of <i>Ntrk2</i> promoter subcloned into pGL3-basic)                                       | (Deogracias et al.,2004)                                                                                                                                          | N/A                               |
| Software and Algorithms                                                                                                                 |                                                                                                                                                                   |                                   |
| Statistical Package for Social Science (SPSS v.24)                                                                                      | IBM<br>( <a href="https://www.ibm.com">https://www.ibm.com</a> )                                                                                                  | RRID:SCR_002865                   |
| CaMPDB (Calpain cleavage prediction using multiple kernel learning; prediction models: MKL, PSSM, SVM linear kernel and SVM RBF kernel) | (DuVerle et al., 2011);<br><a href="http://calpain.org/predict.rb?cls=substrate">http://calpain.org/predict.rb?cls=substrate</a>                                  | RRID:SCR_011976                   |
| GPS-Calpain Cleavage Detector                                                                                                           | (Liu et al., 2011);<br><a href="http://ccd.biocuckoo.org/">http://ccd.biocuckoo.org/</a>                                                                          | RRID:SCR_000202                   |
| SitePrediction (predict cleavage site of proteases)                                                                                     | (Verspurten et al., 2009);<br><a href="http://www.dnbr.ugent.be/prx/bioit2-public/SitePrediction/">http://www.dnbr.ugent.be/prx/bioit2-public/SitePrediction/</a> | N/A                               |
| Predictions for Entire Proteomes (including SNAP prediction of the effects of single amino acid substitutions on protein function)      | (Hecht et al., 2015)<br>( <a href="http://www.predictprotein.org/">http://www.predictprotein.org/</a> )                                                           | RRID:SCR_002803                   |
| GeneSilico Metadisorder service                                                                                                         | (Kozlowski and Bujnicki, 2012);<br><a href="http://genesilico.pl/metadisorder/">http://genesilico.pl/metadisorder/</a>                                            | N/A                               |
| ImageJ                                                                                                                                  | <a href="https://imagej.net/">https://imagej.net/</a>                                                                                                             | RRID:SCR_003070                   |
| Other                                                                                                                                   |                                                                                                                                                                   |                                   |
| Protran Western blotting nitrocellulose membrane                                                                                        | GE Healthcare                                                                                                                                                     | Cat#GE10600002;<br>CAS: 9004-70-0 |
